1 **Local protein synthesis of mtIF3 regulates mitochondrial translation for axonal**  
2 **development**

3 Soyeon Lee<sup>1,2,†</sup>, Dongkeun Park<sup>1,2,†</sup>, Chunghun Lim<sup>1,\*</sup>, Jae-Ick Kim<sup>1,\*</sup>, and Kyung-Tai Min<sup>1,2,3,\*</sup>

4 <sup>1</sup>Department of Biological Sciences, Ulsan National Institute of Science and Technology (UNIST),  
5 Ulsan 44919, Republic of Korea

6 <sup>2</sup>National Creative Research Initiative Center for Proteostasis, Ulsan National Institute of Science and  
7 Technology (UNIST), Ulsan 44919, Republic of Korea

8 <sup>3</sup>Deceased July 23, 2020

9 <sup>†</sup>These authors contributed equally to this work.

10 \*Correspondence: C.L. ([clim@unist.ac.kr](mailto:clim@unist.ac.kr)) or J.-I.K. ([jikim220@unist.ac.kr](mailto:jikim220@unist.ac.kr))

11

12 **Abstract**

13 Mitochondrial initiation factor 3 (mtIF3) binds to and dissociates mitochondrial ribosomes. The mtIF3-  
14 small subunit complex then recruits mtIF2, mRNA, and N-formylmethionine-tRNA to initiate  
15 mitochondrial translation. Intriguingly, transcripts of the nuclear-encoded mtIF3 gene have been shown  
16 present in axonal growth cones; however, the biological function of this compartmentalization remains  
17 largely unknown. Here, we demonstrate that brain-derived neurotrophic factor (BDNF) induces local  
18 translation of mtIF3 mRNA in axonal growth cones. Subsequently, mtIF3 protein is translocated into  
19 axonal mitochondria and promotes mitochondrial translation as assessed by our newly developed  
20 bimolecular fluorescence complementation sensor for the assembly of mitochondrial ribosomes. We  
21 further show that BDNF-induced axonal growth requires mtIF3-dependent mitochondrial translation in  
22 axons. These findings provide new insight into how neurons adaptively control mitochondrial  
23 physiology and axonal development via local mtIF3 translation.

24

## 25 **Introduction**

26 Mitochondrial oxidative phosphorylation (OXPHOS) complexes primarily generate ATP essential  
27 for cellular function in neuronal cell bodies and neurites. In fact, mitochondria are transported to axons  
28 and produce local energy for axon branching, growth cone formation, and axon growth (Rangaraju,  
29 Lauterbach, & Schuman, 2019; Spillane, Ketschek, Merianda, Twiss, & Gallo, 2013; Vaarmann et al.,  
30 2016). The localized mitochondria also play a significant role in facilitating axonal regeneration after  
31 injury (Han, Baig, & Hammarlund, 2016; Lee, Wang, Hwang, Namgung, & Min, 2019; Zhou et al.,  
32 2016). Thus, rapid ATP synthesis in response to local energy demand is likely crucial, particularly for  
33 polarized neuronal function.

34 Although active mitochondrial transport to axonal tip has been shown to support local energy needs  
35 (Saxton & Hollenbeck, 2012; Sheng, 2017), this may not be sufficient to explain how neurons  
36 adaptively regulate mitochondrial function in axons (Niescier, Kwak, Joo, Chang, & Min, 2016). Hence,  
37 we reason that additional mechanisms, such as local synthesis of mitochondrial proteins, should  
38 contribute to the functional control of axonal mitochondria. Most mitochondrial genes are nuclear-  
39 encoded, and once transcribed, their mRNA translation generally occurs in the cell bodies. On the other  
40 hand, previous studies have revealed that transcripts of the nuclear-encoded mitochondrial genes can  
41 be locally translated in axons (A. Aschrafi et al., 2016; Gale, Aschrafi, Gioio, & Kaplan, 2018; Kaplan,  
42 Gioio, Hillefors, & Aschrafi, 2009; Kuzniewska et al., 2020; Shigeoka et al., 2016). Nonetheless, it is  
43 still elusive whether any local synthesis of the nuclear-encoded mitochondrial proteins governs  
44 mitochondrial function in axons.

45 In mammalian cells, mitochondria have only two mitochondrial translation initiation factors, mtIF2  
46 and mtIF3 (Smits, Smeitink, & van den Heuvel, 2010). Interestingly, translome analyses have revealed  
47 mtIF3 translation in axon growth cone (Shigeoka et al., 2016), suggesting a possible role of local mtIF3  
48 synthesis in regulating axonal mitochondrial translation. mtIF3 regulates the dynamics of ribosome  
49 association on mitochondrial mRNAs. mtIF3 catalyzes the dissociation of mitochondrial ribosomes  
50 (mitoribosomes) into large and small subunits while blocking any premature binding of the large subunit  
51 (Christian & Spremulli, 2009; Koc & Spremulli, 2002). mtIF2 and N-formylmethionine-tRNA bind

52 weakly to the small subunit in the absence of mRNA, but mtIF3 facilitates mRNA binding to the small  
53 subunit so that a start codon can be correctly positioned at P-site (Christian & Spremulli, 2009; Smits  
54 et al., 2010).

55 Given the critical role of mtIF3 in mitochondrial translation initiation (Rudler et al., 2019), it is  
56 plausible that locally synthesized mtIF3 may regulate mitochondrial translation in developing axons to  
57 support ATP synthesis and relevant physiology. Studies on mitochondrial translation in live cells,  
58 however, have been hampered by a lack of appropriate tools. Here, we have developed a molecular  
59 sensor that visualizes mitochondrial translation activity using the bimolecular fluorescence  
60 complementation (BiFC) between a specific pair of mitoribosome proteins. In conjunction with  
61 additional transgenic reporters for functional imaging, this new tool has led us to test the hypothesis  
62 above and validate the significance of local mtIF3 translation in mitochondrial physiology and axonal  
63 growth.

64

## 65 **Results**

### 66 **BDNF induces local protein synthesis of mtIF3 in axon growth cone**

67 We first confirmed that mtIF3 mRNAs were present in both cell bodies and axons of primary  
68 hippocampal neurons (Figure 1A), consistent with a previous report (Shigeoka et al., 2016). To examine  
69 whether locally translated mtIF3 proteins translocate into mitochondria, we generated a transgene that  
70 expresses fluorescent mtIF3 proteins fused to the photo-convertible Dendra2 along with N-terminal  
71 palmitoylation sequence (mtIF3-Dendra2) (Lee et al., 2019; Wang et al., 2016) and mtIF3 untranslated  
72 regions (UTRs) (5'UTR<sub>mtIF3</sub>-mtIF3-Dendra2-3'UTR<sub>mtIF3</sub>). As expected, the coding sequence (CDS) of  
73 mtIF3 led to mitochondrial localization of mtIF3-Dendra2 fusion likely due to its mitochondrial  
74 targeting sequence (Figure 1-figure supplement 1). The fluorescent mtIF3-Dendra2 proteins in axons  
75 were irreversibly photo-switched from green to red using 405 nm illumination, and then newly  
76 translated mtIF3-Dendra2 proteins with green fluorescence were measured by analyzing time-lapse  
77 images taken every 5 minutes for 90 minutes. Several studies have suggested that many nuclear-encoded  
78 mitochondrial proteins might be synthesized in response to local energy demand (Gale et al., 2018;

79 Kaplan et al., 2009; Kuzniewska et al., 2020; Shigeoka et al., 2016). This prompted us to examine  
80 whether BDNF treatment in axonal growth cone enhances the local translation of the mtIF3-Dendra2  
81 fusion reporter. Indeed, kymograph analyses revealed that BDNF treatment elevated the newly  
82 synthesized mtIF3-Dendra2 signals in axonal mitochondria (Figure 1B-C). A translation inhibitor,  
83 anisomycin, blocked the de novo synthesis of reporter proteins, validating that BDNF treatment triggers  
84 the local synthesis of mtIF3 proteins in axons and promotes their translocation into axonal mitochondria.

85 Interestingly, mtIF3 3'UTR contains a consensus motif (CTCCCATC) shared by axon-enriched  
86 mRNAs (Shigeoka et al., 2016). We thus generated two additional translation reporters encoding the  
87 fluorescent Dendra2 along with UTRs from mtIF3 (5'UTR<sub>mtIF3</sub>-Dendra2-3'UTR<sub>mtIF3</sub>) or GAPDH  
88 (5'UTR<sub>GAPDH</sub>-Dendra2-3'UTR<sub>GAPDH</sub>). BDNF treatment gradually increased the fluorescence of newly  
89 synthesized Dendra2 from the mtIF3 UTR reporter at the axonal tip, whereas anisomycin treatment  
90 suppressed it (Figure 1D-E). We detected no significant changes in the fluorescence from the control  
91 GAPDH UTR reporter upon BDNF treatment. Together, these results indicate that mtIF3 proteins are  
92 locally synthesized in axon growth cones and translocate into mitochondria in response to BDNF. In  
93 addition, mtIF3 UTRs likely support the axonal transport of mtIF3 mRNAs and their BDNF-induced  
94 translation in axons, regardless of mitochondrial targeting of the translation products.

95

### 96 **Mito-riboBiFC detects translation-dependent assembly of mitoribosomes**

97 We hypothesized that BDNF-induced local translation of mtIF3 proteins might be involved in  
98 regulating mitochondrial translation in developing axon tip. To overcome possible limitations in the  
99 biochemical assessment of mitochondrial translation in axons, we devised a new strategy to visualize  
100 mitochondrial translation in live cells using BiFC (Hu, Chinenov, & Kerppola, 2002) which was  
101 previously used for the visualization of cytoplasmic ribosomal subunit joining (Al-Jubran et al., 2013).  
102 This was based on the physical proximity of mitochondrial ribosomal protein L2 (MRPL2) and  
103 mitochondrial ribosomal protein S6 (MRPS6) at the inter-subunit bridge of 55S mitoribosome (Amunts,  
104 Brown, Toots, Scheres, & Ramakrishnan, 2015) (Figure 2A). We took advantage of this adjacent  
105 localization of the two MRPs as a BiFC pair to visualize mitoribosome assembly during translation. In

106 detail, we split a fluorescent protein mVenus into N-terminal (VN, 1-172 amino acids) and C-terminal  
107 fragments (VC, 155-238 amino acids). Then we fused these mVenus fragments to the C-termini of  
108 MRPS6 (S6-VN) and MRPL2 (L2-VC), respectively. The co-expression of S6-VN and L2-VC in  
109 Neuro2A cells generated mVenus fluorescent signals exclusively in mitochondria (Figure 2B). On the  
110 other hand, another pair of MRPs positioned distantly from each other in mitoribosomes showed  
111 relatively weak fluorescent signals (Figure 2A-D, MRPS16 and MRPL50) even though the latter BiFC  
112 pair were expressed comparably to S6-VN and L2-VC (Figure 2B-D).

113 Unlike cytoplasmic ribosomes, two mitoribosome subunits could be assembled in the absence of  
114 translating mRNAs (Smits et al., 2010). We thus asked if the BiFC signals from the S6-VN and L2-VC  
115 pair would depend on the translation of mitochondrial mRNAs. When we treated puromycin to  
116 dissociate translating ribosome subunits from mRNAs, the BiFC signals were reduced only by 8%  
117 compared to the vehicle control (Figure 2E and F), indicating the mRNA-independent assembly of the  
118 BiFC pair. The average cytoplasmic translation rate is six amino acids per second (Ingolia, Lareau, &  
119 Weissman, 2011), and the longest transcript mt-ND5 mRNA is 1824 bp. In contrast, the fluorescence  
120 signals from the BiFC pair become detectable 10 minutes after complementation (Robida & Kerppola,  
121 2009). Considering that the translation of individual mitochondrial mRNAs could be completed in less  
122 than 2 minutes, it is likely that the translating mitoribosome dissociates from mRNAs before the  
123 chromophore maturation. We thus reasoned that the stabilization of translating mitoribosome would  
124 better visualize their mRNA-dependent emission of the complemented fluorescence signals. Indeed,  
125 chloramphenicol (CA), an inhibitor of the peptide bond formation at mitoribosome E-site, markedly  
126 increased the BiFC signals 60 minutes after treatment, whereas puromycin pre-treatment blocked the  
127 CA effects (Figure 2E-F). Accordingly, we concluded that CA-induced BiFC signals would represent  
128 actively translating mitoribosome and designated our new tool for visualizing mitochondrial translation  
129 as mito-riboBiFC (Figure 2-figure supplement 1).

130

### 131 **Locally synthesized mtIF3 promotes mitochondrial translation in axon growth cone**

132 To test whether locally synthesized mtIF3 facilitates mitochondrial translation in the axon growth

133 cone, we manipulated mtIF3 expression by transient transfections and examined their effects on the  
134 mito-riboBiFC signals in axons. We first confirmed mtIF3 depletion using short hairpin RNA (shRNA)  
135 or transgenic mtIF3 overexpression in NIH/3T3 cells (Figure 3-figure supplement 1). Next, we cultured  
136 hippocampal neurons on a microfluidic device to separate axons from cell bodies (Taylor et al., 2005)  
137 and treated all the drugs only in the axonal channel to induce or block local translation (Figure 3A-B).  
138 The degree of mitochondrial translation was subsequently quantified using CA-induced changes in the  
139 intensity of mito-riboBiFC (Figure 2-figure supplement 1). Notably, neurons expressing control shRNA  
140 exhibited BDNF-induced BiFC signals in the axon growth cone. However, the treatment of a translation  
141 inhibitor cycloheximide (CHX) completely blocked the increment of BiFC signals upon BDNF  
142 treatment, indicating that BDNF-induced local protein synthesis promotes mitochondrial translation.  
143 Importantly, mtIF3 depletion abolished the BDNF-induced mito-riboBiFC signals (Figure 3C-D),  
144 suggesting that locally synthesized mtIF3 is necessary for facilitating mitochondrial translation upon  
145 BDNF treatment.

146 To assess whether mtIF3 overexpression elevates the mitochondrial translation in the absence of  
147 BDNF, we transfected primary hippocampal neurons with a mtIF3 overexpression vector at DIV2 and  
148 measured any change in the mito-riboBiFC signals. Neither the baseline nor BDNF-induced mito-  
149 riboBiFC signals were significantly affected by mtIF3 overexpression under our experimental  
150 conditions. Considering that our transgene for mtIF3 overexpression included mtIF3 UTRs, we reason  
151 that local synthesis of mtIF3 would be tightly regulated at post-transcript levels, and the axonal  
152 abundance of mtIF3 mRNAs may not be limiting for BDNF-induced mitochondrial translation.  
153 Together, these results support that BDNF-induced local protein synthesis of mtIF3 leads to enhanced  
154 mitochondrial translation in the axon growth cone.

155

### 156 **mtIF3-dependent mitochondrial translation elevates ATP generation in growing axons**

157 Next, we questioned whether locally translated mtIF3 would control mitochondrial physiology in  
158 developing axons. To this end, we employed mito-ATeam1.03, a genetically encoded FRET sensor for  
159 mitochondrial ATP (Imamura et al., 2009). CA treatment to primary hippocampal neurons expressing

160 mito-ATeam1.03 reduced the intensity of the FRET signals, indicating that mitochondrial ATP  
161 generation requires mitochondrial translation (Figure 4-figure supplement 1). We further found that  
162 BDNF treatment elevated mitochondrial ATP levels in the axon growth cone, whereas blocking local  
163 translation by CHX nullified the BDNF effects (Figure 4A-B). mtIF3 depletion also blunted BDNF-  
164 induced increase in mitochondrial ATP levels, yet it negligibly affected the baseline ATP levels (Figure  
165 4A-B). We observed no significant effects of mtIF3 overexpression on mitochondrial ATP levels in  
166 axons regardless of BDNF treatment (Figure 4C-D), consistent with mtIF3 effects on mitochondrial  
167 translation in axons. These results support our model that BDNF-induced local synthesis of mtIF3  
168 promotes mitochondrial translation and elevates ATP generation in axonal mitochondria, thereby  
169 fulfilling local energy demand in the developing axons.

170

#### 171 **Axonal development requires mtIF3-dependent mitochondrial translation in growing axons**

172 To determine whether local mitochondrial translation indeed impacts axonal growth, we applied CA to  
173 either cell bodies or axons of primary hippocampal neurons cultured in a microfluidic device (Figure  
174 5A). BDNF was subsequently added to the axonal chamber, and BDNF-induced axon growth was  
175 quantified accordingly. We found that selective inhibition of mitochondrial translation in axons, but not  
176 in cell bodies, suppressed BDNF-induced axon extensions (Figure 5B-C). These data demonstrate that  
177 rapid axon extension by this trophic factor requires local mitochondrial translation in axons. Given that  
178 locally synthesized mtIF3 regulates the mitochondrial translation in axons, we reasoned that mtIF3  
179 depletion would impair axonal extension. Indeed, transient overexpression of mtIF3 shRNA remarkably  
180 shortened axonal length compared to control shRNA (Figure 5D-E). Moreover, mtIF3 depletion  
181 silenced BDNF effects on axon development. We observed that mtIF3 overexpression negligibly  
182 affected axon growth regardless of BDNF treatment (Figure 5-figure supplement 1), consistent with its  
183 lack of any significant effects on mitochondrial translation and ATP generation in axons. Together, our  
184 findings validate that mtIF3-dependent mitochondrial translation in axons plays a critical role in axonal  
185 development.

186



## 187 **Discussion**

188 Local protein synthesis is a distinctive feature in neurons that have highly polarized neurites, which  
189 is indispensable for the maintenance of axonal or dendritic structures and functions such as neurite  
190 development, the guidance of growth cone, synaptic transmission, synaptic plasticity, branch formation,  
191 and regeneration (Hafner, Donlin-Asp, Leitch, Herzog, & Schuman, 2019; Jung, Yoon, & Holt, 2012;  
192 Shigeoka et al., 2019). The gene ontology analyses revealed high enrichment of synaptic proteins,  
193 cytoskeletal proteins, and ribosomal proteins in axonal translome (Gumy et al., 2011; Shigeoka et al.,  
194 2016). Interestingly, it has been also identified that transcripts of nuclear-encoded mitochondrial  
195 proteins are abundant in developing and mature axons (A. Aschrafi et al., 2016; Gale et al., 2018; Kaplan  
196 et al., 2009; Kuzniewska et al., 2020; Shigeoka et al., 2016), implicating their local translation in  
197 sustaining mitochondrial function and axonal viability. Nonetheless, only a few studies have  
198 documented that local translation of nuclear-encoded mitochondrial proteins can affect mitochondrial  
199 function and axonal survival (Armaz Aschrafi, Natera-Naranjo, Gioio, & Kaplan, 2010; Hillefors, Gioio,  
200 Mameza, & Kaplan, 2007; Natera-Naranjo et al., 2012; Yoon et al., 2012).

201 Here, we demonstrate that nuclear-encoded mtIF3 is locally translated in developing axons, thereby  
202 promoting axonal mitochondrial translation as assessed by our newly developed mito-riboBiFC sensor.  
203 Many studies have demonstrated that stationary mitochondria in axons fuel spatially restricted  
204 boundaries (Rangaraju et al., 2019; Spillane et al., 2013), but what remains unsolved is how these  
205 stationary mitochondria are supported and maintained in the long-term. Our results suggest that  
206 mitochondrial proteins may be replenished by enhanced mitochondrial translation via local protein  
207 synthesis in axons. We observed that the mtIF3 depletion cancels out the upregulation of mitochondrial  
208 translation and ATP production upon BDNF stimulation. Lack of this local translation and adaptive  
209 control of mitochondrial function limits axonal development, validating its critical role in neuronal  
210 physiology. However, we also observed that the overexpression of mtIF3 *per se* did not affect  
211 mitochondrial functions. It has been recently shown that mitochondrial translation is synchronized and  
212 unidirectionally controlled by cytosolic translation (Couvillion, Soto, Shipkovenska, & Churchman,  
213 2016). Our observation consistently implicates that enhanced mitochondrial functions for local energy

214 demanding are accomplished by not the mitochondrial translation alone but the simultaneous cytosolic  
215 translation. Therefore, our findings suggest that local translation in axons can be a crucial mechanism  
216 by which mitochondrial translation is regulated in mammalian neurons.

217 In the past decade, much effort has been made to develop the tools for measuring or observing  
218 mitochondrial translation. For instance, biochemical detection of newly synthesized mitochondrial  
219 proteins has been widely used for studying mitochondrial translation (Barsh et al., 2015; Chatenay-  
220 Lapointe & Shadel, 2011; Park, Lee, & Min, 2020; Richter-Dennerlein et al., 2016; Richter, Lahtinen,  
221 Marttinen, Suomi, & Battersby, 2015). However, a lack of appropriate imaging tools for mitochondrial  
222 translation has hindered assessing this subcellular event at single-cell levels. A recent study visualized  
223 mitochondrial translation using a non-canonical amino acid labeling *in situ* (Estell, Stamatidou, El-  
224 Messeiry, & Hamilton, 2017). This method allows the detection of mitochondrial translation at a single-  
225 cell resolution, but its application is limited to fixed cells. Our study developed a new method designated  
226 as mito-riboBiFC to monitor mitochondrial translation in live cells. Mito-riboBiFC enables us to  
227 investigate mitochondrial translation on distinct spatiotemporal scales. Accordingly, it will be of great  
228 interest to determine how mitochondrial translation is regulated depending on their subcellular location  
229 or mitochondrial dynamics, especially in neurons where subcellular environment and energetic needs  
230 are spatially distinct.

231 Nonetheless, mito-riboBiFC has some limitations that should be improved in the future. These  
232 include relatively slow maturation kinetics of the mito-riboBiFC. Mitochondria are highly dynamic and  
233 heterogeneous in terms of their transport, membrane potential, and biogenesis. These mitochondrial  
234 events can occur on a relatively short timescale (e.g., a few seconds or minutes), compared to the folding  
235 and maturation time of the BiFC complex (Rose, Briddon, & Holliday, 2010). The employment of a  
236 new chromophore in BiFC imaging should improve the current temporal resolution of our mito-  
237 riboBiFC, better visualizing the rapid change in mitochondrial translation according to diverse  
238 mitochondrial dynamics.

239 In conclusion, our results provide new insights into understanding the adaptive regulation of  
240 mitochondrial physiology via local protein synthesis of a nuclear-encoded mitochondrial translation

241 factor during axonal development. New imaging tools for the mitochondrial function should further  
242 dissect the molecular mechanisms underlying the spatiotemporal control of mitochondria physiology  
243 and hint at novel therapeutic strategies to treat relevant neurodevelopmental diseases.

244

## 245 **Materials and methods**

### 246 Animals

247 Pregnant mice (C57BL/6J, Hyochang Science, Korea) were used for primary hippocampal neuron  
248 culture. All experimental procedures were conducted in accordance with protocols approved by  
249 Institutional Animal Care and Use Committee of Ulsan National Institute of Science and Technology  
250 (UNIST).

251

### 252 Cell culture

#### 253 *Primary hippocampal neurons*

254 Primary hippocampal neuron culture was processed as follows. In brief, hippocampi were dissected  
255 from E18 mouse embryos and they were washed with HBSS (Invitrogen). Hippocampi were digested  
256 by 0.025% trypsin (Invitrogen) and washed with trituration media (90% of Dulbecco Modified Eagle  
257 Medium and 10% fetal bovine serum, Invitrogen). Dissociated cells were seeded onto 50 µg/ml of poly-  
258 D-lysine (Sigma) coated culture dishes or coverslips. After settlement of cells, neurons were maintained  
259 with neuronal culture media, which consists of Neurobasal media, GlutaMax, B27, and penicillin-  
260 streptomycin (Invitrogen). Neurons were transfected with lipofectamine 2000 (Invitrogen).

261

#### 262 *Cell lines*

263 Neuro2A cell line was used for mito-riboBiFC experiments and purchased from ATCC. Neuro2A cells  
264 were maintained in culture media, which consists of Dulbecco Modified Eagle Medium and 10% fetal  
265 bovine serum, and 1% penicillin-streptomycin (Invitrogen). Using mycoplasma detection kit (Takara,  
266 6601), we confirmed no contamination in Neuro2A cell line. PEI (Polysciences, 23966-1) or  
267 lipofectamine 2000 (Invitrogen) were used for transfecting constructs into Neuro2A cells. NIH/3T3 was

268 purchased from ATCC and used for the modulation of mtIF3 expression. Cells were maintained in  
269 culture media, which consists of Dulbecco Modified Eagle Medium and 10% calf serum, and 1%  
270 penicillin-streptomycin (Invitrogen). Metafectene (Biontex) was used for the transfection of mtIF3  
271 constructs.

272

### 273 Separation of cell bodies and axons

274 To isolate lysate of cell bodies and axons separately, neurons were seeded on the 6-well inserts with 3  
275  $\mu\text{m}$  pore size (SPL Life Sciences). Samples of cell bodies and axons were collected by scrapping the  
276 upper and bottom side of inserts. To treat cell bodies or axons separately with drugs, neurons were  
277 placed on microfluidic devices (Xona Microfluidics). Microfluidic devices were attached to glass  
278 bottom dish (In Vitro Scientific, D60-30-1.5) for live cell imaging or 22 mm square coverslips (Globe  
279 Scientific, 1404-15) for fixed samples. 30 ng/ml of BDNF (Sigma), 50  $\mu\text{g}/\text{ml}$  of chloramphenicol  
280 (Sigma), 20  $\mu\text{M}$  of anisomycin (Sigma), and 100  $\mu\text{g}/\text{ml}$  of cycloheximide (Sigma) were used for drugs  
281 treatment.

282

### 283 Vector preparation

284 For local protein synthesis assay, *pDendra2-C* vector (Evrogen) was modified: 5'UTR of *mtIF3-2xPal-*  
285 *Dendra2-3'UTR of mtIF3*, 5'UTR of *mtIF3-CDS of mtIF3-2xPal-Dendra2-3'UTR of mtIF3*, and 5'UTR  
286 of *GAPDH-2xPal-Dendra2-3'UTR of GAPDH*. To block the effect of diffusion, two repeats of  
287 palmitoylation sequence was added. For mito-riboBiFC assay, *pcDNA6/V5-HisA* (Invitrogen) plasmid  
288 was modified: Neuro2A cDNA sequence of Mouse *Mrps6* (NM\_080456.1), *Mrpl2* (NM\_025302.4),  
289 *Mrps16* (NM\_025440.3), and *Mrpl50* (NM\_178603.4) were used to generate *MRPS6-VN172*, *MRPL2-*  
290 *VC155*, *MRPS16-VN172*, and *MRPL50-VC155* constructs. VC was fused to MRPL2 and MRPL50 by  
291 linker peptides: GSKQKVMNH. MRPS6 and MRPS16 were fused to VN by linker peptides: GSRSIAT.  
292 For the modulation of mtIF3 expression, *AAV-shRNA-ctrl* (Addgene, #85741), and *pcDNA6/V5-HisA*  
293 plasmid was modified: *pAAV2-Control-shRNA-TagRFP657*, *pAAV2-mtIF3-shRNA-TagRFP657*,  
294 *pcDNA6-5'UTR of mtIF3-3xFLAG-P2A-TagRFP657-3'UTR of mtIF3*, and *pcDNA6-5'UTR of mtIF3-*

295 *CDS of mtIF3-3xFLAG-P2A-TagRFP657-3'UTR of mtIF3.*

296

297 Confocal microscopy and image analysis

298 All the images were taken using a confocal microscope (Zeiss LSM 780). Live cell imaging was  
299 performed in a live cell chamber that was maintained at 37°C and 5% CO<sub>2</sub> by heating instrument.

300 Definite Focus z-correction hardware was used to maintain the z-axis during the time lapse image.

301 Orthogonal projection and image crop were processed in ZEN 3.1 (blue edition). Fluorescence signal  
302 intensity was quantified by ImageJ (NIH).

303

304 Local protein synthesis assay

305 For local mRNA translation assay, Dendra2 fluorescence protein was conjugated with UTRs of mtIF3  
306 or GAPDH: 5'UTR of mtIF3-Palmitoylation sequence-Dendra2-3'UTR of mtIF3, 5'UTR of mtIF3-  
307 CDS of mtIF3-Palmitoylation sequence-Dendra2-3'UTR of mtIF3, and 5'UTR of GAPDH-  
308 Palmitoylation sequence-Dendra2-3'UTR of GAPDH. Primary hippocampal neurons were transfected  
309 with these vectors at DIV3 by using Lipofectamine 2000 (Invitrogen). 24 hours after transfection,  
310 protein synthesis assay was performed. Existing fluorescence of dendra2 (green) was photoconverted  
311 into red fluorescence with 405 nm laser for 10 seconds and newly synthesized green signals were  
312 measured for 90 minutes with 5 minutes time lapse image. Protein synthesis inhibitor, anisomycin (20  
313 μM, Sigma) was used to confirm that the increased green signal was from *de novo* protein synthesis.

314

315 Live cell imaging

316 Before mito-riboBiFC imaging in Neuro2A cells, culture medium was replaced and cells were incubated  
317 for 30 minutes. 20 μM of puromycin (Sigma) was applied for 10 minutes. After puromycin treatment,  
318 50 μg/ml of chloramphenicol (Sigma) was sequentially treated. To label mitochondria, mito-mTFP1  
319 was also transfected. Images were acquired using 458, 514nm lasers.

320 For ATP imaging, primary hippocampal neurons were cultured into microfluidic devices, which were

321 attached on glass bottom dishes. Neurons were transfected with shRNAs at DIV1 and then transfected  
322 with overexpression vectors at DIV2. At DIV3, images were acquired using 458, 514, and 633 nm lasers.  
323 To fix mitochondrial ribosomes, chloramphenicol was treated for 90 minutes. BDNF or cycloheximide  
324 were also treated simultaneously to induce or block local translation and images were taken after 90  
325 minutes. Fluorescent intensity was measured from five mitochondria at the end of axons. The ratio of  
326 before and after drug treatment was averaged to measure the degree of mitochondrial translation. For  
327 mitochondrial ATP imaging, primary hippocampal neurons were transfected with genetically encoded  
328 FRET-based ATP indicator for mitochondria, mito-ATeam1.03, at DIV1 for mtIF3 knockdown study or  
329 at DIV2 for mtIF3 overexpression study by using Lipofectamine 2000 (Invitrogen). Images were taken  
330 at emission of 475 nm and 527 nm with a 405 nm excitation laser. BDNF or cycloheximide were applied  
331 to axonal chamber for 90 minutes. The increased ratio of FRET to CFP before and after drug treatment  
332 was calculated.

333 For mtIF3 localization determination imaging, annotated vector was transfected using PEI in Neuro2A.  
334 250nM of MitoTracker™ Deep Red FM (Invitrogen, M22426) was added to cells and images were  
335 acquired after 10 minutes. Images were acquired using 488, 633nm lasers.

336

### 337 Western blotting

338 Cells were lysed by using RIPA buffer (150 mM sodium chloride, 1% Triton X-100, 0.5% sodium  
339 deoxycholate and 0.1% sodium dodecyl sulfate). Proteins were separated by SDS-PAGE and transferred  
340 to PVDF membranes (Millipore). Membranes were blocked with 5% skim milk in TBST (10 mM Tris,  
341 150 mM NaCl, 0.5% Tween 20) for 30 minutes. For immunoblotting, antibodies against mtIF3 (Sigma,  
342 HPA039791, polyclonal) and  $\beta$ -tubulin (Abcam, ab6046, polyclonal) were incubated at 4°C for  
343 overnight. Membranes were washed three times for 10 minutes with TBST and horseradish peroxidase-  
344 conjugated anti-rabbit secondary antibody (Jackson immunoresearch) was incubated for 1 hour.  
345 Membranes were washed three times for 10 minutes with TBST and developed with ECL solution (Bio-  
346 Rad).

347

348 RT-PCR

349 Total RNA of cell body and axon fractionations was isolated with PicoPure RNA isolation kit (Applied  
350 Biosystems). 200 ng of RNA was subjected to RT-PCR by using High Capacity RNA-to-cDNA kit (Life  
351 Technologies). The primers used for PCR:  
352 forward 5'-GAGAGCAGATCCACCAGGAG-3' and  
353 reverse 5'-CTGTTTCCGTCGTCGTCTTT-3' for mtIF3;  
354 forward 5'-ACCAACTGGGACGACATGGAGAAGA-3' and  
355 reverse 5'-CGTTGCCAATAGTGATGACCTGGCC-3' for  $\beta$ -actin;  
356 forward 5'-GGACGACATGGAGAAGATCTGGCAC-3' and  
357 reverse 5'-CCGGACACCGGAACCGCTCATTG-3' for  $\gamma$ -actin.

358

359 Immunostaining

360 For primary hippocampal neurons and NIH/3T3 cells, cells were rinsed with PBS and fixed with 4%  
361 PFA for 10 minutes. Cell were permeabilized with PBST (PBS with 0.2% Triton X-100) for 10 minutes  
362 and blocked with 1% BSA in PBST for 30 minutes. Primary antibodies were incubated at 4°C for  
363 overnight. Antibodies against Tau1 (Millipore, MAB3420, monoclonal), FLAG (Sigma, F7425,  
364 polyclonal), and MTCO1 (Abcam, ab203912, monoclonal) were used for immunostaining. The cells  
365 were washed three times with PBS and incubated with Alexa Fluor secondary antibodies (Invitrogen).  
366 Then these cells were washed three times with PBS and coverslips were mounted on slide glasses.  
367 Images were taken by using LSM780 confocal microscopy. For Neuro2A, cells were washed with ice-  
368 cold PBS followed by fixation using 4% PFA/sucrose for 15 minutes. After 3 times washing with PBS,  
369 cells were permeabilized with PBST (PBS with 0.5% Triton X-100) for 15 minutes and blocked with  
370 1% BSA in PBS for 1 hour. Primary antibodies were incubated at 4°C for overnight. Cells were washed  
371 3 times with PBS and incubated with Alexa Fluor secondary antibodies (Invitrogen) for 1 hour at room  
372 temperature. Cells were washed three times with PBS and coverslips were mounted on slide glasses.

373 Antibodies against GFP (Abcam, ab 6556, polyclonal) and MT-CO1 (Abcam, ab14705, monoclonal)  
374 were used for immunostaining.

375

### 376 Statistical analysis

377 Statistical analyses were performed by using Prism software (GraphPad Software) or R (version 3.6.1)  
378 with ARTool library (Kay & Wobbrock, 2016; Wobbrock, Findlater, Gergle, & Higgins, 2011). All the  
379 values were presented with mean  $\pm$  SEM. Shapiro-Wilk test for normality ( $P < 0.05$ ) or Brown-Forsythe  
380 test for equal variance ( $P < 0.05$ ) were used to determine the statistical analysis for each dataset. Ordinary  
381 two-way ANOVA with Dunnett's test (repeated measure) or Tukey's test (non-repeated measure),  
382 aligned ranks transformation ANOVA with Wilcoxon signed-rank test (repeated measure) or Wilcoxon  
383 rank-sum (non-repeated measure) were used to determine statistical differences between the groups.  $P$   
384  $< 0.05$  was considered as statistically significant.  $*P < 0.05$ ,  $**P < 0.01$ ,  $***P < 0.001$ ,  $****P < 0.0001$ .

385

386

### 387 **Acknowledgements**

388 We wish to dedicate this work to the life and career of our beloved mentor and colleague, Dr. Kyung-  
389 Tai Min, who passed away recently. This work was supported by Basic Science Research Program  
390 through the National Research Foundation of Korea (NRF) funded by the Ministry of Science and ICT  
391 (2016R1A3B1905982 to K.M., 2020R1A2C1005492 to J.-I.K.). This work was also supported by a  
392 grant from the Suh Kyungbae Foundation (SUHF-17020101 to C.L.).

393

### 394 **Competing interests**

395 No competing interests declared

396

### 397 **Author contribution**

398 Conceptualization, D.P. and K.M.; Methodology, S.L., D.P., C.L., J.-I.K. and K.M.; Investigation, S.L.  
399 and D.P.; Interpretation of Data, S.L., D.P., C.L., J.-I.K. and K.M.; Writing – Original Draft, S.L., D.P.



400 and K.M.; Writing – Review & Editing, S.L., D.P., C.L. and J.-I.K.; Funding Acquisition, C.L., J.-I.K.  
401 and K.M.; Supervision, C.L., J.-I.K. and K.M.

402

## 403 **References**

- 404 Al-Jubran, K., Wen, J., Abdullahi, A., Roy Chaudhury, S., Li, M., Ramanathan, P., . . . Brogna, S. (2013).  
405 Visualization of the joining of ribosomal subunits reveals the presence of 80S ribosomes in  
406 the nucleus. *RNA*, *19*(12), 1669-1683. doi:10.1261/rna.038356.113
- 407 Amunts, A., Brown, A., Toots, J., Scheres, S. H. W., & Ramakrishnan, V. (2015). The structure of the  
408 human mitochondrial ribosome. *Science*, *348*(6230), 95-98. doi:10.1126/science.aaa1193
- 409 Aschrafi, A., Kar, A. N., Gale, J. R., Elkahoun, A. G., Vargas, J. N., Sales, N., . . . Kaplan, B. B. (2016). A  
410 heterogeneous population of nuclear-encoded mitochondrial mRNAs is present in the axons  
411 of primary sympathetic neurons. *Mitochondrion*, *30*, 18-23. doi:10.1016/j.mito.2016.06.002
- 412 Aschrafi, A., Natera-Naranjo, O., Gioio, A. E., & Kaplan, B. B. (2010). Regulation of axonal trafficking  
413 of cytochrome c oxidase IV mRNA. *Molecular and Cellular Neuroscience*, *43*(4), 422-430.
- 414 Barsh, G. S., Lagouge, M., Mourier, A., Lee, H. J., Spåhr, H., Wai, T., . . . Larsson, N.-G. (2015). SLIRP  
415 Regulates the Rate of Mitochondrial Protein Synthesis and Protects LRPPRC from  
416 Degradation. *PLOS Genetics*, *11*(8), e1005423. doi:10.1371/journal.pgen.1005423
- 417 Chatenay-Lapointe, M., & Shadel, G. S. (2011). Repression of mitochondrial translation, respiration  
418 and a metabolic cycle-regulated gene, SLF1, by the yeast Pumilio-family protein Puf3p. *PLoS*  
419 *One*, *6*(5), e20441. doi:10.1371/journal.pone.0020441
- 420 Christian, B. E., & Spremulli, L. L. (2009). Evidence for an Active Role of IF3mt in the Initiation of  
421 Translation in Mammalian Mitochondria. *Biochemistry*, *48*(15), 3269-3278.  
422 doi:10.1021/bi8023493
- 423 Couvillion, M. T., Soto, I. C., Shipkovenska, G., & Churchman, L. S. (2016). Synchronized mitochondrial  
424 and cytosolic translation programs. *Nature*, *533*(7604), 499-503. doi:10.1038/nature18015
- 425 Estell, C., Stamatidou, E., El-Messeiry, S., & Hamilton, A. (2017). In situ imaging of mitochondrial  
426 translation shows weak correlation with nucleoid DNA intensity and no suppression during  
427 mitosis. *J Cell Sci*, *130*(24), 4193-4199. doi:10.1242/jcs.206714
- 428 Gale, J. R., Aschrafi, A., Gioio, A. E., & Kaplan, B. B. (2018). Nuclear-Encoded Mitochondrial mRNAs:  
429 A Powerful Force in Axonal Growth and Development. *Neuroscientist*, *24*(2), 142-155.  
430 doi:10.1177/1073858417714225
- 431 Greber, B. J., Bieri, P., Leibundgut, M., Leitner, A., Aebersold, R., Boehringer, D., & Ban, N. (2015). The  
432 complete structure of the 55S mammalian mitochondrial ribosome. *Science*, *348*(6232), 303-  
433 308. doi:10.1126/science.aaa3872
- 434 Gumy, L. F., Yeo, G. S., Tung, Y.-C. L., Zivraj, K. H., Willis, D., Coppola, G., . . . Fawcett, J. W. (2011).  
435 Transcriptome analysis of embryonic and adult sensory axons reveals changes in mRNA

- 436 repertoire localization. *Rna*, 17(1), 85-98.
- 437 Hafner, A. S., Donlin-Asp, P. G., Leitch, B., Herzog, E., & Schuman, E. M. (2019). Local protein synthesis  
438 is a ubiquitous feature of neuronal pre- and postsynaptic compartments. *Science*, 364(6441).  
439 doi:10.1126/science.aau3644
- 440 Han, S. M., Baig, H. S., & Hammarlund, M. (2016). Mitochondria Localize to Injured Axons to Support  
441 Regeneration. *Neuron*, 92(6), 1308-1323. doi:10.1016/j.neuron.2016.11.025
- 442 Hillefors, M., Gioio, A. E., Mameza, M. G., & Kaplan, B. B. (2007). Axon viability and mitochondrial  
443 function are dependent on local protein synthesis in sympathetic neurons. *Cell Mol  
444 Neurobiol*, 27(6), 701-716. doi:10.1007/s10571-007-9148-y
- 445 Hu, C.-D., Chinenov, Y., & Kerppola, T. K. (2002). Visualization of interactions among bZIP and Rel  
446 family proteins in living cells using bimolecular fluorescence complementation. *Molecular  
447 cell*, 9(4), 789-798.
- 448 Imamura, H., Nhat, K. P., Togawa, H., Saito, K., Iino, R., Kato-Yamada, Y., . . . Noji, H. (2009). Visualization  
449 of ATP levels inside single living cells with fluorescence resonance energy transfer-based  
450 genetically encoded indicators. *Proc Natl Acad Sci U S A*, 106(37), 15651-15656.  
451 doi:10.1073/pnas.0904764106
- 452 Ingolia, N. T., Lareau, L. F., & Weissman, J. S. (2011). Ribosome profiling of mouse embryonic stem  
453 cells reveals the complexity and dynamics of mammalian proteomes. *Cell*, 147(4), 789-802.  
454 doi:10.1016/j.cell.2011.10.002
- 455 Jung, H., Yoon, B. C., & Holt, C. E. (2012). Axonal mRNA localization and local protein synthesis in  
456 nervous system assembly, maintenance and repair. *Nat Rev Neurosci*, 13(5), 308-324.  
457 doi:10.1038/nrn3210
- 458 Kaplan, B. B., Gioio, A. E., Hillefors, M., & Aschrafi, A. (2009). Axonal protein synthesis and the  
459 regulation of local mitochondrial function. *Results Probl Cell Differ*, 48, 225-242.  
460 doi:10.1007/400\_2009\_1
- 461 Kay, M., & Wobbrock, J. (2016). ARTool: aligned rank transform for nonparametric factorial ANOVAs.  
462 *R package version 0.10, 2*.
- 463 Koc, E. C., & Spremulli, L. L. (2002). Identification of mammalian mitochondrial translational initiation  
464 factor 3 and examination of its role in initiation complex formation with natural mRNAs. *J  
465 Biol Chem*, 277(38), 35541-35549. doi:10.1074/jbc.M202498200
- 466 Kuzniewska, B., Cysewski, D., Wasilewski, M., Sakowska, P., Milek, J., Kulinski, T. M., . . . Dziembowska,  
467 M. (2020). Mitochondrial protein biogenesis in the synapse is supported by local translation.  
468 *EMBO Rep*, e48882. doi:10.15252/embr.201948882
- 469 Lee, S., Wang, W., Hwang, J., Namgung, U., & Min, K. T. (2019). Increased ER-mitochondria tethering  
470 promotes axon regeneration. *Proc Natl Acad Sci U S A*, 116(32), 16074-16079.  
471 doi:10.1073/pnas.1818830116
- 472 Natera-Naranjo, O., Kar, A. N., Aschrafi, A., Gervasi, N. M., Macgibeny, M. A., Gioio, A. E., & Kaplan,  
473 B. B. (2012). Local translation of ATP synthase subunit 9 mRNA alters ATP levels and the  
474 production of ROS in the axon. *Molecular and Cellular Neuroscience*, 49(3), 263-270.

- 475 Niescier, R. F., Kwak, S. K., Joo, S. H., Chang, K. T., & Min, K. T. (2016). Dynamics of Mitochondrial  
476 Transport in Axons. *Front Cell Neurosci*, *10*, 123. doi:10.3389/fncel.2016.00123
- 477 Park, D., Lee, S., & Min, K.-T. (2020). Techniques for investigating mitochondrial gene expression.  
478 *BMB Reports*, *53*(1), 3-9. doi:10.5483/BMBRep.2020.53.1.272
- 479 Rangaraju, V., Lauterbach, M., & Schuman, E. M. (2019). Spatially Stable Mitochondrial Compartments  
480 Fuel Local Translation during Plasticity. *Cell*, *176*(1-2), 73-84 e15.  
481 doi:10.1016/j.cell.2018.12.013
- 482 Richter-Dennerlein, R., Oeljeklaus, S., Lorenzi, I., Ronsor, C., Bareth, B., Schendzielorz, A. B., . . .  
483 Dennerlein, S. (2016). Mitochondrial Protein Synthesis Adapts to Influx of Nuclear-Encoded  
484 Protein. *Cell*, *167*(2), 471-483 e410. doi:10.1016/j.cell.2016.09.003
- 485 Richter, U., Lahtinen, T., Marttinen, P., Suomi, F., & Battersby, B. J. (2015). Quality control of  
486 mitochondrial protein synthesis is required for membrane integrity and cell fitness. *Journal*  
487 *of Cell Biology*, *211*(2), 373-389. doi:10.1083/jcb.201504062
- 488 Robida, A. M., & Kerppola, T. K. (2009). Bimolecular fluorescence complementation analysis of  
489 inducible protein interactions: effects of factors affecting protein folding on fluorescent  
490 protein fragment association. *J Mol Biol*, *394*(3), 391-409. doi:10.1016/j.jmb.2009.08.069
- 491 Rose, R. H., Briddon, S. J., & Holliday, N. D. (2010). Bimolecular fluorescence complementation:  
492 lighting up seven transmembrane domain receptor signalling networks. *Br J Pharmacol*,  
493 *159*(4), 738-750. doi:10.1111/j.1476-5381.2009.00480.x
- 494 Rudler, D. L., Hughes, L. A., Perks, K. L., Richman, T. R., Kuznetsova, I., Ermer, J. A., . . . Hool, L. C.  
495 (2019). Fidelity of translation initiation is required for coordinated respiratory complex  
496 assembly. *Science advances*, *5*(12), eaay2118.
- 497 Saxton, W. M., & Hollenbeck, P. J. (2012). The axonal transport of mitochondria. *J Cell Sci*, *125*(Pt 9),  
498 2095-2104. doi:10.1242/jcs.053850
- 499 Sheng, Z. H. (2017). The Interplay of Axonal Energy Homeostasis and Mitochondrial Trafficking and  
500 Anchoring. *Trends Cell Biol*, *27*(6), 403-416. doi:10.1016/j.tcb.2017.01.005
- 501 Shigeoka, T., Jung, H., Jung, J., Turner-Bridger, B., Ohk, J., Lin, J. Q., . . . Holt, C. E. (2016). Dynamic  
502 Axonal Translation in Developing and Mature Visual Circuits. *Cell*, *166*(1), 181-192.  
503 doi:10.1016/j.cell.2016.05.029
- 504 Shigeoka, T., Koppers, M., Wong, H. H., Lin, J. Q., Cagnetta, R., Dwivedy, A., . . . Holt, C. E. (2019). On-  
505 Site Ribosome Remodeling by Locally Synthesized Ribosomal Proteins in Axons. *Cell Rep*,  
506 *29*(11), 3605-3619 e3610. doi:10.1016/j.celrep.2019.11.025
- 507 Smits, P., Smeitink, J., & van den Heuvel, L. (2010). Mitochondrial Translation and Beyond: Processes  
508 Implicated in Combined Oxidative Phosphorylation Deficiencies. *Journal of Biomedicine and*  
509 *Biotechnology*, *2010*, 737385. doi:10.1155/2010/737385
- 510 Spillane, M., Ketschek, A., Merianda, T. T., Twiss, J. L., & Gallo, G. (2013). Mitochondria coordinate  
511 sites of axon branching through localized intra-axonal protein synthesis. *Cell Rep*, *5*(6), 1564-  
512 1575. doi:10.1016/j.celrep.2013.11.022
- 513 Taylor, A. M., Blurton-Jones, M., Rhee, S. W., Cribbs, D. H., Cotman, C. W., & Jeon, N. L. (2005). A

514 microfluidic culture platform for CNS axonal injury, regeneration and transport. *Nat Methods*,  
515 2(8), 599-605. doi:10.1038/nmeth777

516 Vaarmann, A., Mandel, M., Zeb, A., Wareski, P., Liiv, J., Kuum, M., . . . Kaasik, A. (2016). Mitochondrial  
517 biogenesis is required for axonal growth. *Development*, 143(11), 1981-1992.  
518 doi:10.1242/dev.128926

519 Wang, W., Rai, A., Hur, E. M., Smilansky, Z., Chang, K. T., & Min, K. T. (2016). DSCR1 is required for  
520 both axonal growth cone extension and steering. *J Cell Biol*, 213(4), 451-462.  
521 doi:10.1083/jcb.201510107

522 Wobbrock, J. O., Findlater, L., Gergle, D., & Higgins, J. J. (2011). *The aligned rank transform for*  
523 *nonparametric factorial analyses using only anova procedures*. Paper presented at the  
524 Proceedings of the SIGCHI conference on human factors in computing systems.

525 Yoon, B. C., Jung, H., Dwivedy, A., O'Hare, C. M., Zivraj, K. H., & Holt, C. E. (2012). Local translation  
526 of extranuclear lamin B promotes axon maintenance. *Cell*, 148(4), 752-764.  
527 doi:10.1016/j.cell.2011.11.064

528 Zhou, B., Yu, P., Lin, M. Y., Sun, T., Chen, Y., & Sheng, Z. H. (2016). Facilitation of axon regeneration  
529 by enhancing mitochondrial transport and rescuing energy deficits. *J Cell Biol*, 214(1), 103-  
530 119. doi:10.1083/jcb.201605101

531

532 **Figure legend**

**Figure 1. Lee, Park et al**

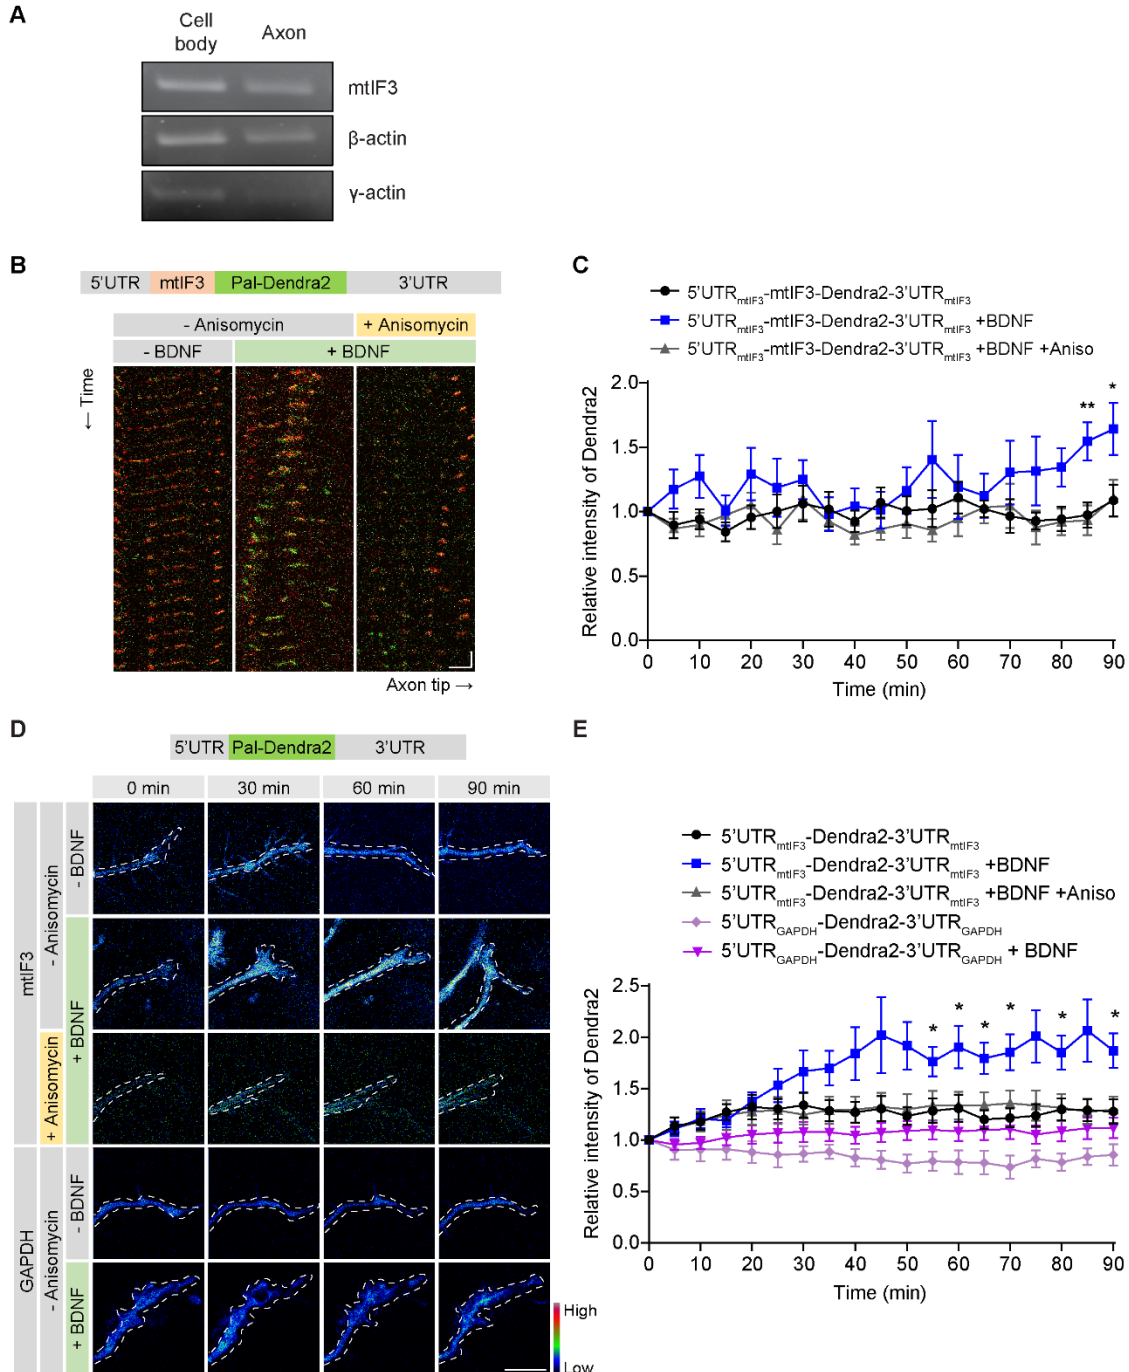

533

534 **Figure 1. BDNF induces local protein synthesis of mtIF3 in the axon growth cone.**

535 (A) mtIF3 mRNAs were detected in both cell bodies and axons of primary hippocampal neurons at

536 DIV4. RNA samples were purified from the isolated lysates of cell bodies and axons. RT-PCR was  
537 performed using each pair of gene-specific primers. **(B)** Kymographs of newly synthesized mtIF3-  
538 Dendra2 fusion proteins in axons. Primary hippocampal neurons were transfected with an expression  
539 vector for the photoconvertible mtIF3-Dendra2 protein at DIV3, and the fluorescent intensity of  
540 mtIF3-Dendra2 fusion was analyzed at DIV4 (horizontal scale bar, 5  $\mu\text{m}$ ; vertical scale bar, 5  
541 minutes). The existing mtIF3-Dendra2 was first photoconverted from green to red over the 20  $\mu\text{m}$   
542 path from the axon tip. Images were then taken at 5-minute intervals for 90 minutes. Where indicated,  
543 BDNF (30 ng/ml) and anisomycin (20  $\mu\text{M}$ ) were added at a 0-minute timepoint. **(C)** Quantification of  
544 newly synthesized mtIF3-Dendra2 proteins. The green fluorescence was measured from mitochondria  
545 at the very end of the axonal tip. The relative intensity at each time point was calculated by  
546 normalizing to that at a 0-minute timepoint. Data represent mean  $\pm$  SEM (N = 6–8 axons from 3  
547 independent experiments). \* $P < 0.05$ , \*\* $P < 0.01$ , as determined by two-way repeated-measures  
548 ANOVA with Dunnett's multiple comparisons test. **(D)** Pseudo-color images of locally synthesized  
549 Dendra2 reporter in the axonal tip. Primary hippocampal neurons were transfected with an expression  
550 vector for the photoconvertible Dendra2 reporter harboring the indicated UTRs at DIV3. The newly  
551 synthesized Dendra2 reporter was analyzed at DIV4 (scale bar, 10  $\mu\text{m}$ ) similarly as in panel B. **(E)**  
552 Quantification of newly synthesized Dendra2 reporters in the axonal tip after drug treatment. Data  
553 represent mean  $\pm$  SEM (N = 6–10 axons from 3 independent experiments). \* $P < 0.05$ , as determined  
554 by two-way repeated-measures ANOVA with Dunnett's multiple comparisons test.

555

Figure. 2. Lee, Park et al

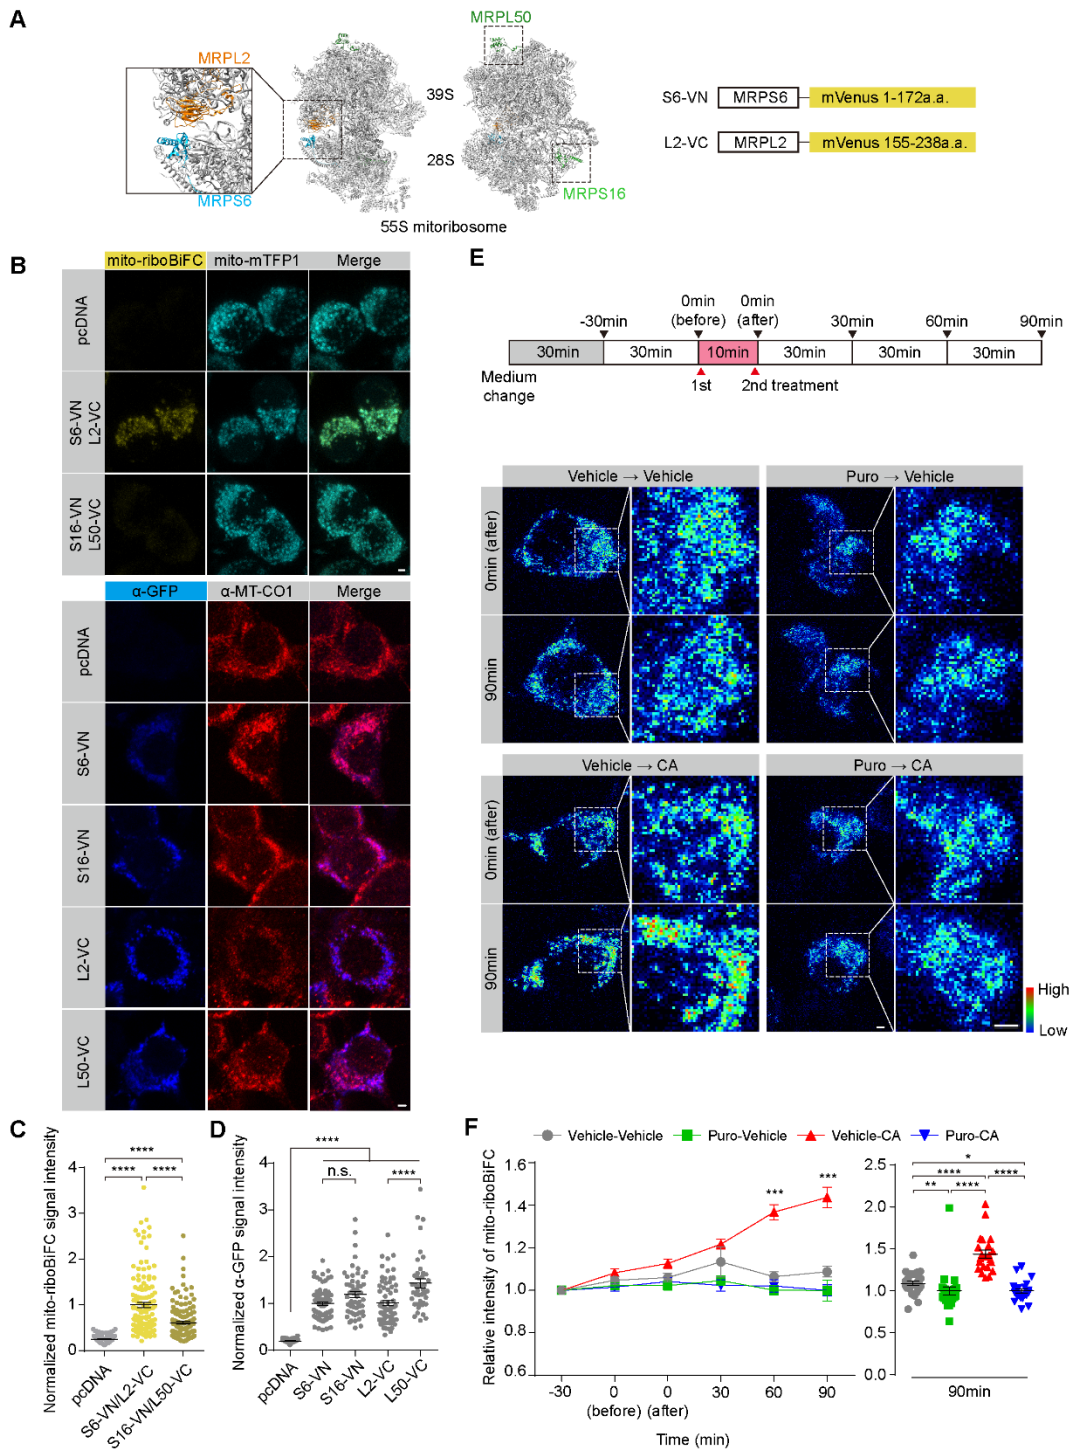

556

557 **Figure 2. Mito-riboBiFC detects translation-dependent assembly of mitoribosomes.**

558 (A) Schematic design of mito-riboBiFC. Mitochondrial ribosomal proteins MRPL2 and MRPS6 were

559 used as a BiFC pair for the mito-riboBiFC and illustrated with porcine 55S mitoribosome cryo-EM

560 structure (Greber et al., 2015). MRPS16 and MRPL50 served as a negative control. **(B)**  
561 Representative images of mito-riboBiFC (top) and anti-GFP antibody staining (bottom) in Neuro2A  
562 cells. Mito-mTFP1 and MT-CO1 were used as mitochondrial markers (scale bar, 2  $\mu$ m). **(C)**  
563 Quantification of the fluorescent mito-riboBiFC signals in panel B. Data represent mean  $\pm$  SEM (N =  
564 100–143 cells from 3 independent experiments). \*\*\*\* $P < 0.0001$ , as determined by aligned ranks  
565 transformation ANOVA with Wilcoxon rank-sum test. **(D)** Quantification of At-GFP signal intensity  
566 in panel B. Data represent mean  $\pm$  SEM (N = 41–76 cells from 3 independent experiments). n.s., not  
567 significant; \*\*\*\* $P < 0.0001$ , as determined by aligned ranks transformation ANOVA with Wilcoxon  
568 rank-sum test. **(E)** Pseudo-color images of mito-riboBiFC after sequential treatment of puromycin  
569 (Puro) and chloramphenicol (CA) (scale bar, 2  $\mu$ m). **(F)** Quantification of the mito-riboBiFC signals  
570 in panel E. Line plot shows the intensity changes of mito-riboBiFC. A Vehicle-CA group was  
571 compared with other groups at each time point for the statistical test (left panel). Dot plot displays the  
572 relative intensity of the mito-riboBiFC 90 minutes after CA treatment (1<sup>st</sup> vehicle, water; 2<sup>nd</sup> vehicle,  
573 ethanol). Data represent mean  $\pm$  SEM (N = 22–26 cells from 3 independent experiments). Aligned  
574 ranks transformation ANOVA detected significant interaction effects of Puro and CA on the mito-  
575 riboBiFC intensity at the 90-minute time point ( $P < 0.0001$ ). \*\* $P < 0.01$ , \*\*\*\* $P < 0.0001$ , as  
576 determined by Wilcoxon signed-rank test (left panel) or Wilcoxon rank-sum test (right panel).  
577



Figure 3. Lee, Park et al

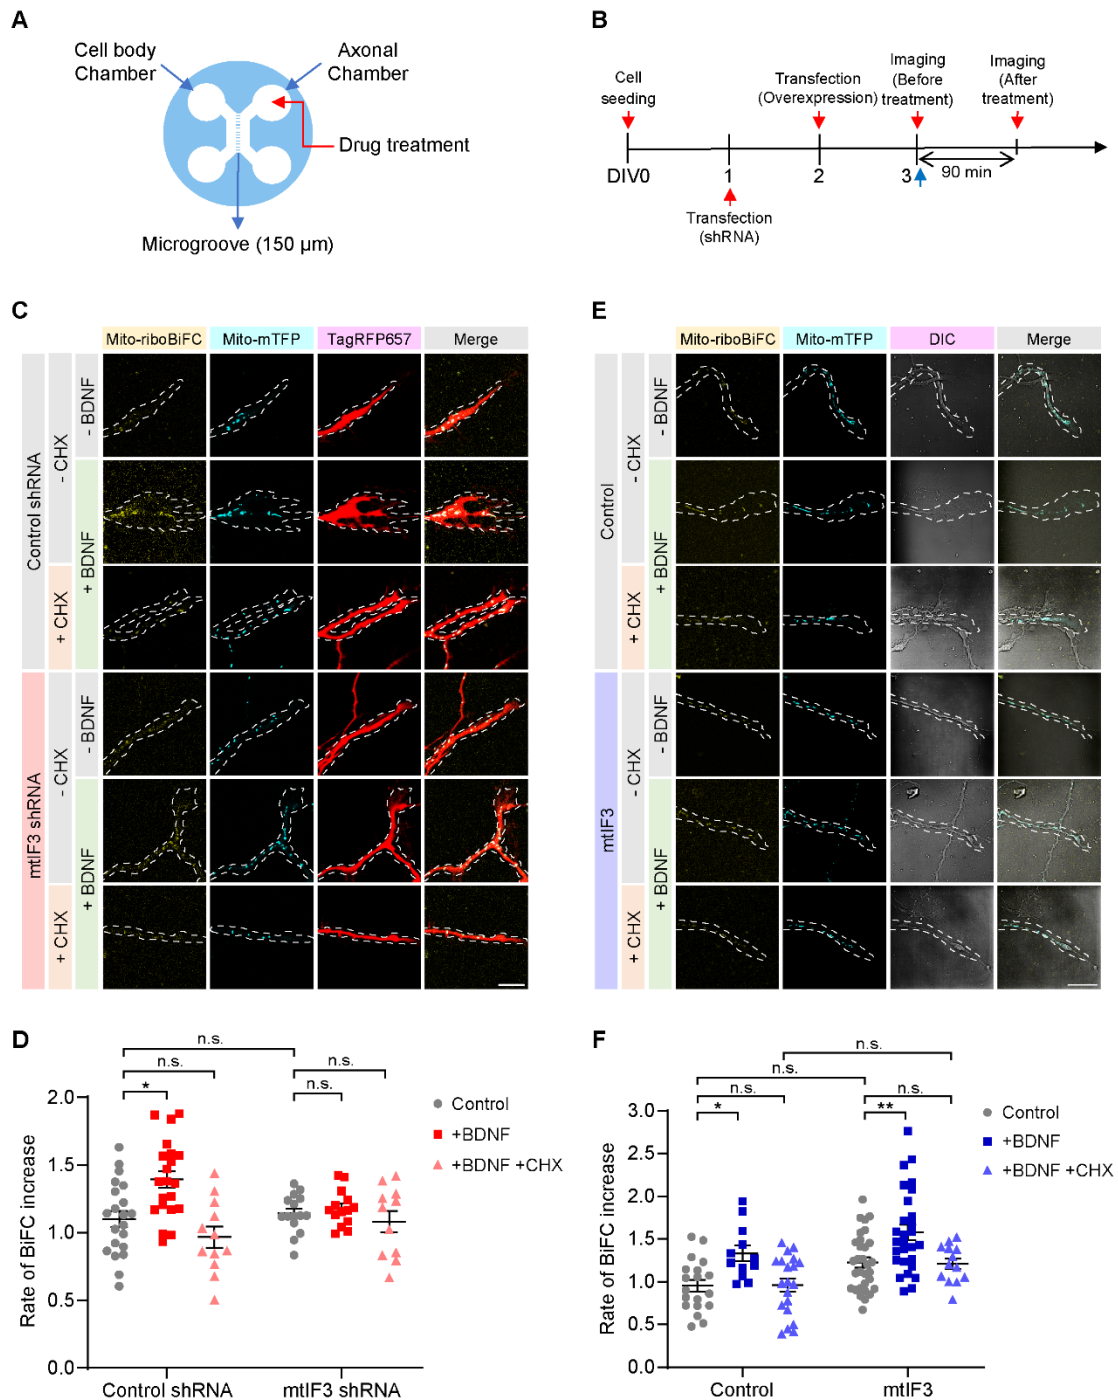

578

579 **Figure 3. Local protein synthesis of mtIF3 is necessary for mitochondrial translation in the**  
580 **axonal growth cone.**

581 (A) Schematic illustration of a microfluidic device. Primary hippocampal neurons were seeded into

582 the cell body chamber. Growing axons reached the other side of the device through the microgroove.  
583 To locally stimulate axons, drugs were treated to the axonal chamber. **(B)** Timeline for mito-riboBiFC  
584 experiments. After cell seeding, shRNA and overexpression vectors were transfected at DIV2 and  
585 DIV3, respectively. Images were sequentially taken before and after drug treatment. **(C, D)**  
586 Visualization of mitochondrial translation in mtIF3-depleted axon growth cones by mito-riboBiFC.  
587 Mitochondria were marked by mitochondria-targeted mTFP1. Transfection of shRNA was confirmed  
588 by TagRFP657 expression (scale bar, 20  $\mu\text{m}$ ). Mito-riboBiFC was quantified, and the rate of BiFC  
589 increase upon drug treatment was measured. Five mitochondria per axon were analyzed. Data  
590 represent mean  $\pm$  SEM (N = 11–21 axons from 3 independent experiments). Aligned ranks  
591 transformation ANOVA detected significant interaction effects of mtIF3 depletion and BDNF on the  
592 BiFC rate ( $P = 0.0180$ ). n.s., not significant;  $*P < 0.05$ , as determined by Wilcoxon rank-sum test  
593 (BDNF) or two-way ANOVA with Tukey's multiple comparisons test (BDNF+CHX). **(E, F)**  
594 Representative images of mito-riboBiFC in mtIF3-overexpressing axon growth cones (scale bar, 20  
595  $\mu\text{m}$ ). Mito-riboBiFC signals were analyzed before and after the CA treatment. Five mitochondria per  
596 axon were analyzed. Data represent mean  $\pm$  SEM (N = 12–31 axons from 4 independent  
597 experiments). Two-way ANOVA detected no significant interaction effects of mtIF3 overexpression  
598 and drug treatments. n.s., not significant;  $*P < 0.05$ ,  $**P < 0.01$ , as determined by Tukey's multiple  
599 comparisons test.  
600

Figure 4. Lee, Park et al

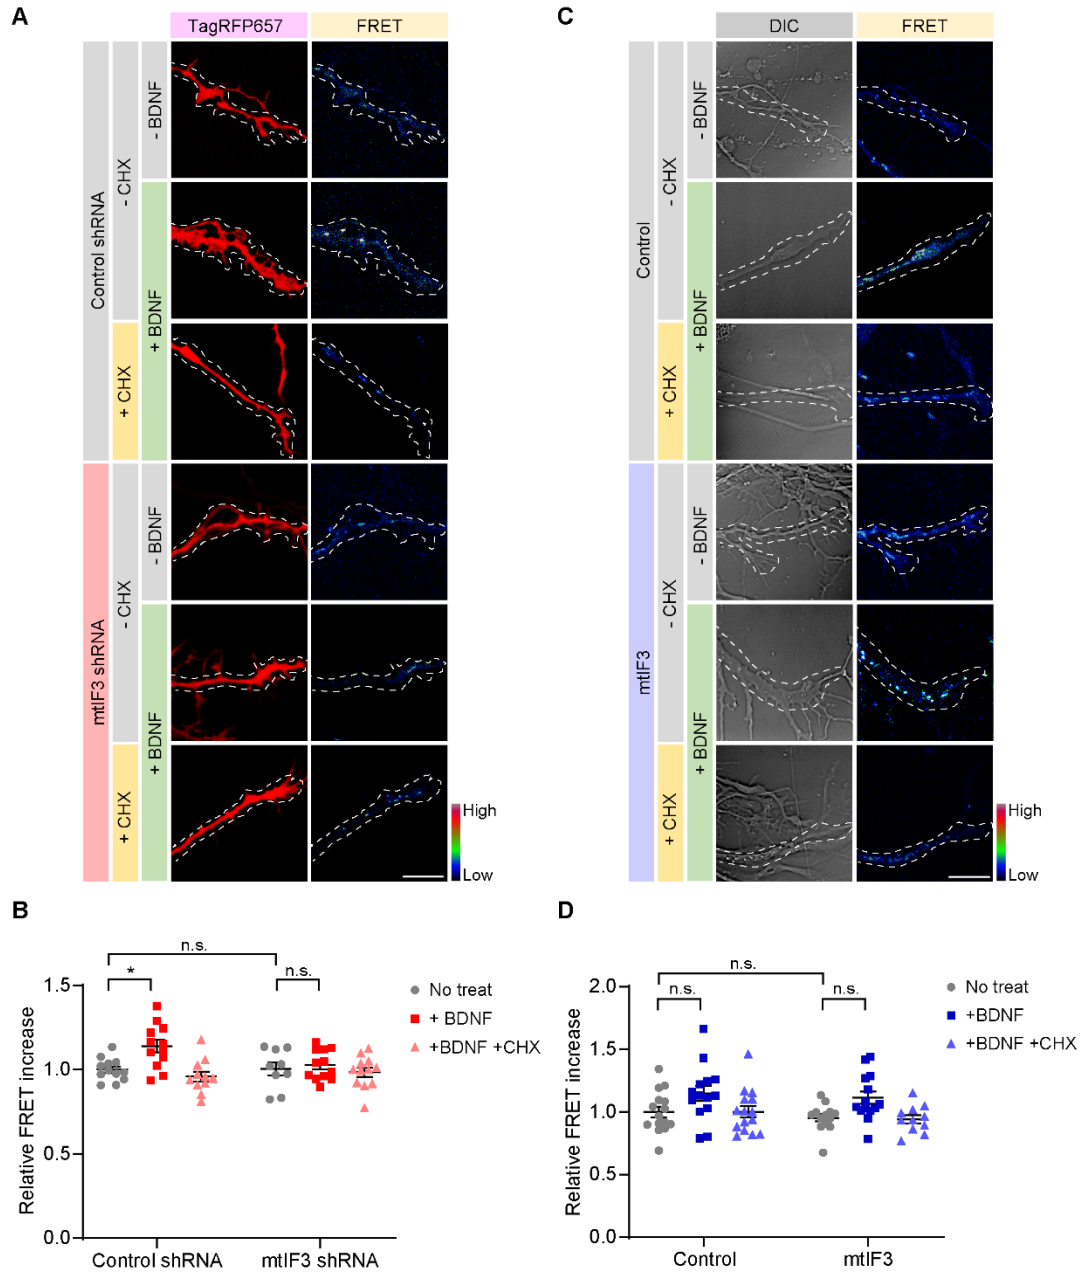

601

602 **Figure 4. mtIF3-dependent mitochondrial translation elevates ATP generation in the axonal**  
603 **growth cone.**

604 (A, C) ATP levels in axonal mitochondria were measured using genetically encoded ATP indicator

605 mito-ATeam1.03. FRET signals were shown in the pseudo-color image. Expression of shRNA was  
606 confirmed by TagRFP657 expression (scale bar, 10  $\mu$ m). **(B, D)** Quantification of the relative FRET  
607 intensity in mtIF3-depleted or mtIF3-overexpressing axons. FRET signals were measured by  
608 comparing the ratio before and after chemical treatments. Five mitochondria per axon were analyzed.  
609 Data represent mean  $\pm$  SEM (N = 9–15 axons from 4–5 independent experiments). Two-way  
610 ANOVA detected significant effects of BDNF, but not of BDNF+CHX, on the FRET signals ( $P =$   
611 0.0124 in panel B;  $P = 0.0020$  in panel D). n.s., not significant;  $*P < 0.05$ , as determined by Tukey's  
612 multiple comparisons test.  
613

Figure 5. Lee, Park et al

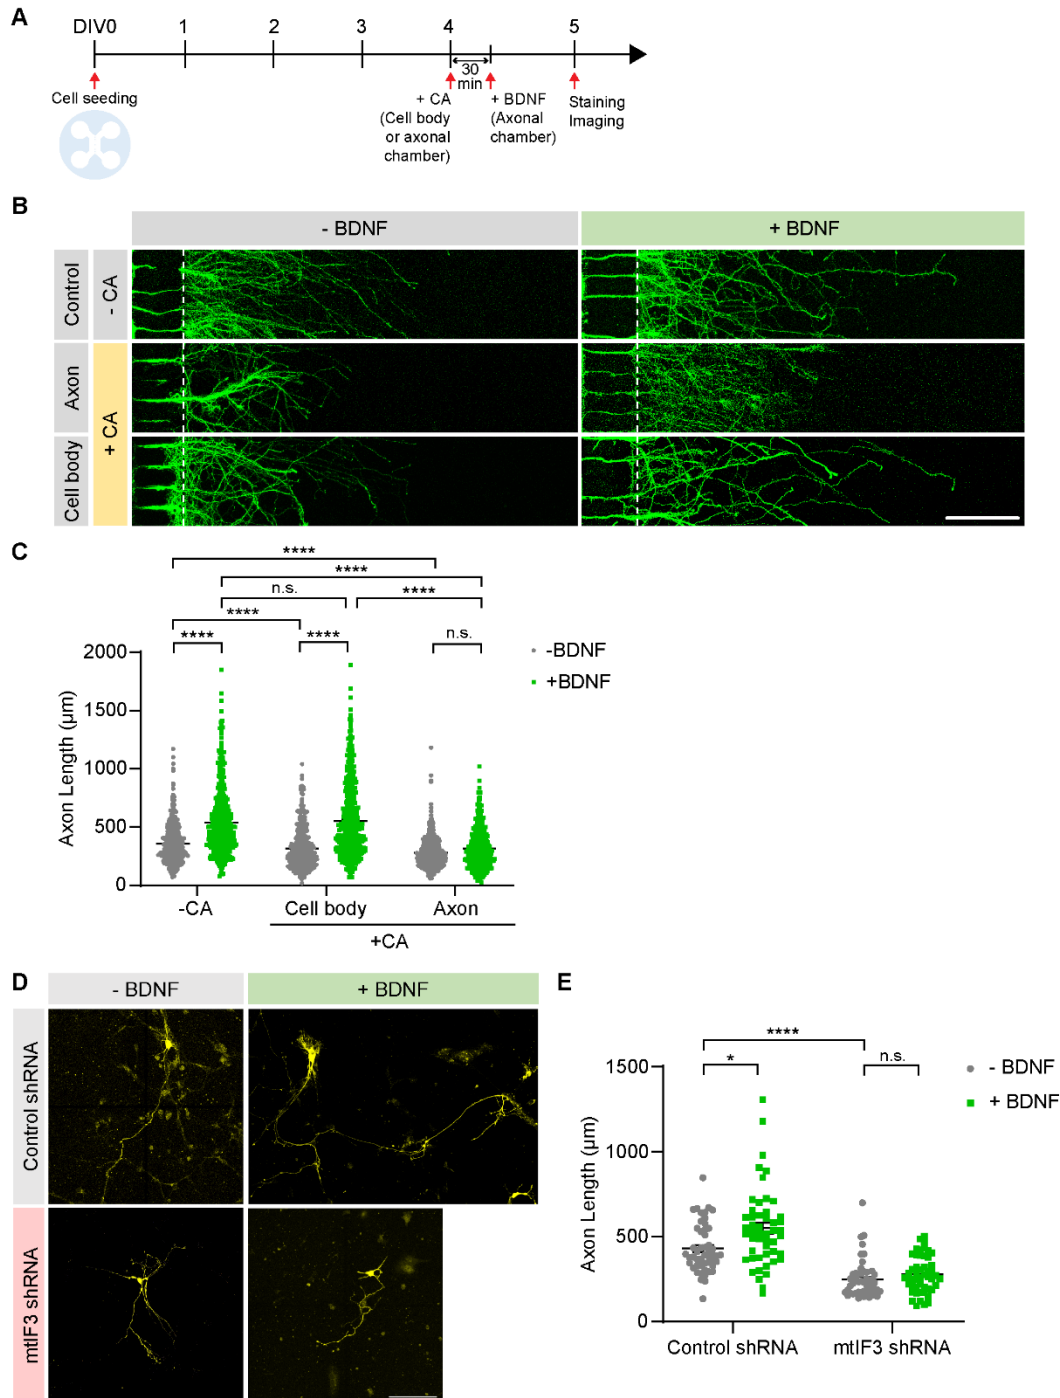

614

615 **Figure 5. Axonal development requires mtIF3-dependent mitochondrial translation in growing**  
 616 **axons.**

617 (A) Timeline for the experiment. Primary hippocampal neurons were cultured on a microfluidic

618 device. At DIV4, chloramphenicol (CA) was added to either the cell body or axonal chamber. After  
619 30 minutes, BDNF was added to the axonal chamber. Neurons were stained and imaged at DIV5. **(B)**  
620 Representative images of axons. Axons were marked by Tau-1 immunostaining (scale bar, 200  $\mu\text{m}$ ).  
621 **(C)** The axonal length was measured from the exit border of microgrooves (dotted lines). Data  
622 represent mean  $\pm$  SEM (N = 422–745 axons from 4–5 independent experiments). n.s., not significant;  
623 \*\*\*\* $P < 0.0001$ , as determined by Aligned ranks transformation ANOVA with Wilcoxon rank-sum  
624 test. **(D)** Representative images of mtIF3-depleted or BDNF-treated primary hippocampal neurons.  
625 mtIF3 depletion impaired the extension of the axon growth cone. Hippocampal neurons were first  
626 transfected with mtIF3 shRNA and then treated with BDNF at DIV3. The axonal length was  
627 measured at DIV5 (scale bar, 100  $\mu\text{m}$ ). **(E)** quantification of axon length in panel D. Data represent  
628 mean  $\pm$  SEM (N = 50 neurons from 5 independent experiments). Aligned ranks transformation  
629 ANOVA detected significant interaction effects of mtIF3 depletion and BDNF on the axon length ( $P$   
630 = 0.0375). n.s., not significant; \* $P < 0.05$ , \*\*\*\* $P < 0.0001$ , as determined by Wilcoxon rank-sum test  
631

632 **Supplementary figure legend**

**Figure 1-figure supplement 1. Lee, Park et al**

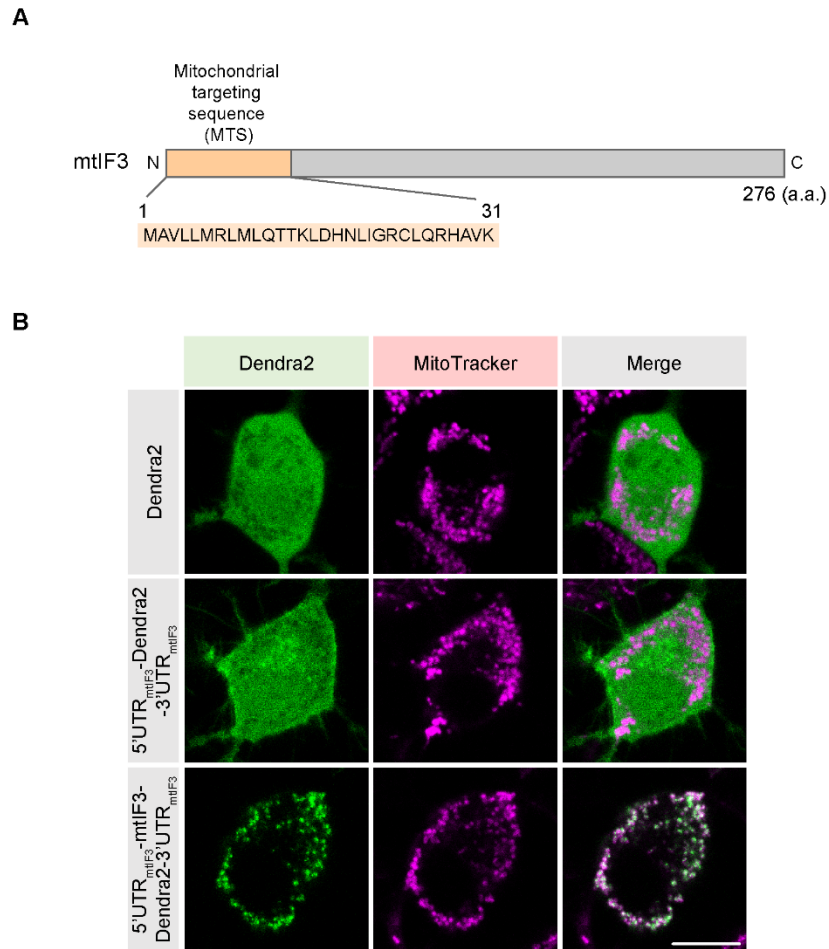

633

634 **Figure 1-figure supplement 1. mtIF3-Dendra2 is localized to mitochondria.**

635 **(A)** Schematic illustration of mtIF3 coding sequence. mtIF3 has mitochondrial targeting sequence in N-

636 terminal domain (131 a.a.) (Koc & Spremulli, 2002). **(B)** Neuro2A cells were transfected with Dendra2  
637 vectors. Mitochondria were labeled with MitoTracker deep red dye. CDS of mtIF3 led to mitochondrial  
638 localization of Dendra2 (scale bar, 10  $\mu$ m).  
639



Figure 2-figure supplement 1. Lee, Park et al

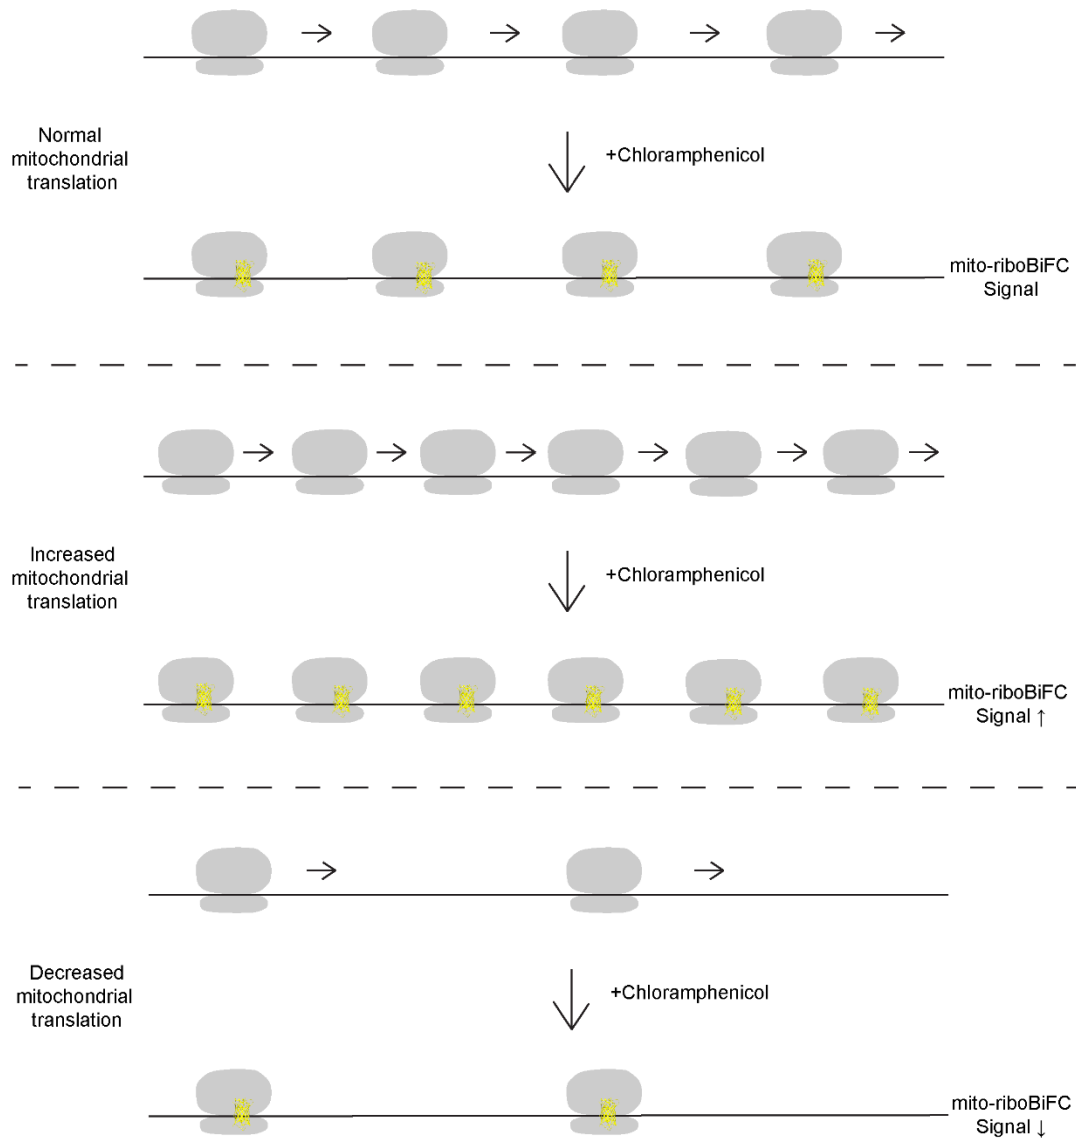

640

641 **Figure 2-figure supplement 1. Schematic illustration of mito-riboBiFC analysis.**

642 Translating ribosomal complex exhibits active dynamics. During the elongation, ribosomal subunits

643 consistently rotate, which results in low intensity mito-riboBiFC. To freeze translating mitochondrial

644 ribosomes, we treated chloramphenicol that inhibits the formation of peptide bond. Non-rotated  
645 ribosomal complex is expected to show high BiFC signal. 90 minutes after the treatment of  
646 chloramphenicol, we compared the intensity of mito-riboBiFC before and after chloramphenicol  
647 treatment. Because highly translating mRNA binds to more ribosomes, we could detect higher signal  
648 increase in actively translating mRNA.  
649

Figure 3-figure supplement 1. Lee, Park et al

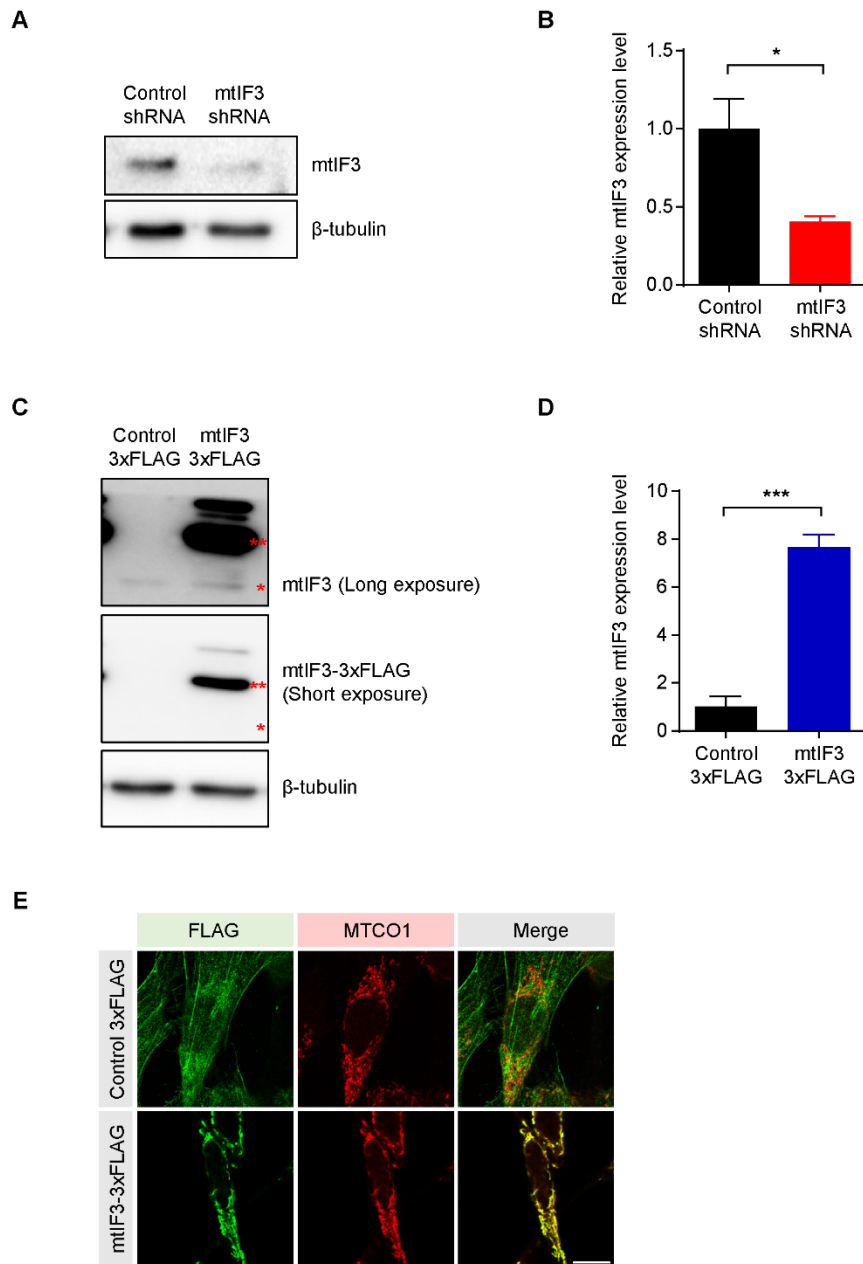

650

651 **Figure 3-figure supplement 1. Modulation of mtIF3 expression level.**

652 **(A, B)** mtIF3 level was reduced by RNA interference with shRNA. By performing western blot, we

653 verified the successful reduction of mtIF3 48 hours after incubation of shRNA in NIH/3T3 cells. The

654 level of mtIF3 was decreased about 50% compared with control group. The mtIF3 expression level was  
655 normalized to  $\beta$ -tubulin level. N = 5 independent experiments. (C, D) mtIF3 was upregulated by  
656 overexpression vector in NIH/3T3 cells. Overexpression vectors contain tandems of FLAG epitope tag.  
657 Western blot results showed the expression of mtIF3 overexpression vector. Single red asterisk indicates  
658 endogenous mtIF3 and double red asterisk indicates exogenous mtIF3 that is conjugated with FLAG  
659 tag. The level of overexpressed mtIF3 was about 8 times higher than endogenous mtIF3 level. N = 3  
660 independent experiments. (E) Immunofluorescence images demonstrating the localization of  
661 overexpressed mtIF3 to mitochondria in NIH/3T3 cells. FLAG staining detected the transfected  
662 overexpression or control vectors. Mitochondria were marked by MTCO1 staining (scale bar, 10  $\mu$ m).  
663 The values were presented as mean  $\pm$  SEM and statistical significance was analyzed by unpaired t-test.  
664 \* $P$  < 0.05, \*\*\* $P$  < 0.001.

665

Figure 4-figure supplement 1. Lee, Park et al

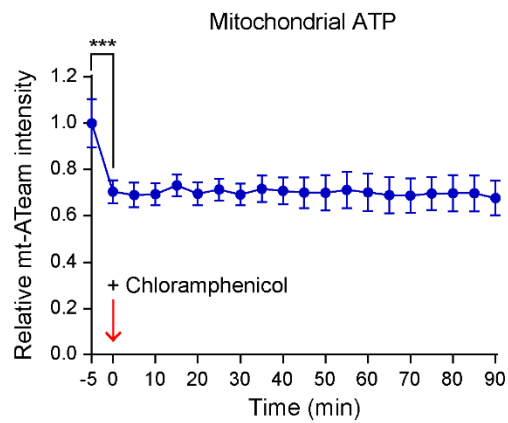

666

667 **Figure 4-figure supplement 1. Blocking mitochondrial translation decreases mitochondrial ATP**  
668 **level.**

669 Treatment of chloramphenicol caused the rapid decrease of FRET intensity. Primary hippocampal

670 neurons were transfected with Mt-ATeam1.03 at DIV2 and images were taken every 5 minutes for 90  
671 minutes at DIV3. The values are presented as mean  $\pm$  SEM and statistical significance was tested  
672 between 5 minutes before treatment and 0 minute after treatment using paired t-test. N = 10 cells from  
673 3 independent experiments. \*\*\* $P < 0.001$ .

674

Figure 5-figure supplement 1. Lee, Park et al

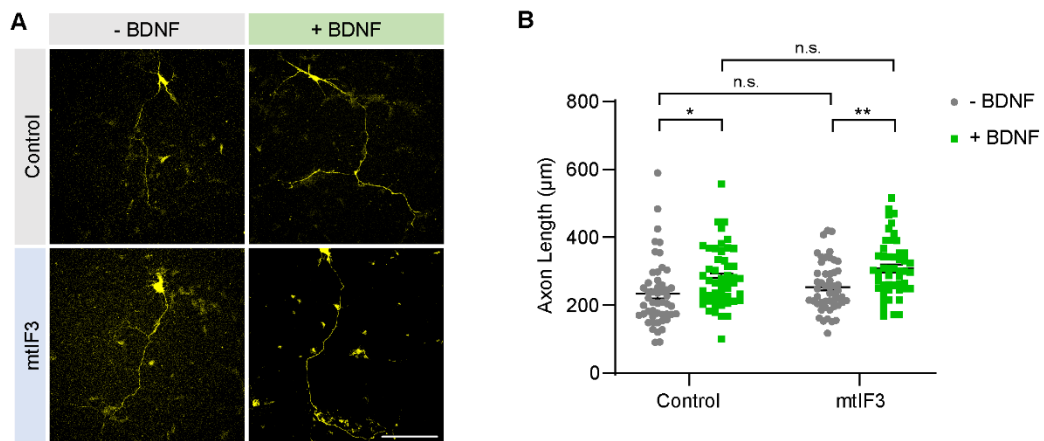

675

676 **Figure 5-figure supplement 1. mtIF3 overexpression is not enough to promote axon extension, but**

677 **BDNF treatment still facilitates axon growth.**

678 **(A)** Representative images of primary neurons expressing mtIF3 overexpression vectors. Hippocampal

679 neurons were transfected with control and overexpression vectors at DIV2 and BDNF was also treated  
680 simultaneously. Images were taken at DIV3. Transfection of overexpression vector was confirmed by  
681 TagRFP657 expression. Hippocampal neurons were identified by their morphology (scale bar, 100  $\mu$ m).  
682 **(B)** Quantification of axonal length. Overexpression of mtIF3 had no additional effect on axon growth,  
683 while BDNF treatment still promoted axonal length. Data represent mean  $\pm$  SEM (N = 50 neurons from  
684 5 independent experiments). Aligned ranks transformation ANOVA detected no significant interaction  
685 effects of mtIF3 overexpression and drug treatment. n.s., not significant; \* $P < 0.05$ , \*\* $P < 0.01$ , as  
686 determined by Wilcoxon rank-sum test.  
687
